# Supplementary material
Source: Elsevier journal article supplement (https://www.sciencedirect.com/science/article/pii/S1889898X17300439)
Supplement: mmc1 [file S1889898X17300439:mmc1.pdf]

Tratamiento ambulatorio frente a tratamiento hospitalario en el paciente con insuficiencia cardiaca aguda

## **CUADERNO DE RECOGIDA DE DATOS**

### **VARIABLES CLÍNICAS Y DEMOGRÁFICAS**

Nombre del paciente:

**Código:**

NHC:

Teléfono 1:

Teléfono 2:

Fecha de nacimiento:

Edad:

Sexo:

Fecha de aleatorización:

Nº días de tratamiento:

|                                         |                          |                      |               |         |
|-----------------------------------------|--------------------------|----------------------|---------------|---------|
| HTA                                     | No                       | Sí                   |               |         |
| Hiperlipemia                            | No                       | Sí                   |               |         |
| Tabaquismo                              | No                       | Actual               | Ex fumador    |         |
| Alcoholismo                             | No                       | Actual               | Ex alcohólico |         |
| Diabetes mellitus                       | No                       | Sí                   |               |         |
| Cardiopatía isquémica previa            | No                       | Sí                   |               |         |
| IAM previo                              | No                       | Sí                   |               |         |
| Valvulopatía previa                     | No                       | Sí                   |               |         |
| Tipo de IC                              | Crónica                  | De novo-             |               |         |
| Tiempo de evolución aproximado (meses): |                          |                      |               |         |
| Ingresos previos por IC                 | No                       | Sí                   |               |         |
| Nº de ingresos previos:                 |                          |                      |               |         |
| Grado funcional                         | I                        | II                   | III           | IV      |
| FEVI:                                   |                          |                      |               |         |
| FEVI-cualitativa:                       | Conservada ( $\geq 50$ ) | Deprimida ( $< 50$ ) |               |         |
| Llenado mitral:                         |                          |                      |               |         |
| Historia de FA (cualquier tipo)         | No                       | Sí                   |               |         |
| Ritmo actual                            | Sinusal                  | FA permanente        |               |         |
| Frecuencia cardiaca:                    |                          |                      |               |         |
| Dispositivos                            | No                       | MCP                  | TRC           | DAI     |
|                                         |                          |                      |               | TRC+DAI |

## Tratamiento ambulatorio frente a tratamiento hospitalario en el paciente con insuficiencia cardiaca aguda

## Etiología

Isquémica

HTA

Valvulopatía

MCD/Alcohólica

Otras

**TRATAMIENTO** (en 24 horas)

Diurético                      No                      Sí

Tipo diurético              Furosemida:                      Torasemida:                      HCT:                      Otros:

Necesidad de tratamiento diurético iv:              No                      Si

IECA                      No                      Sí

Tipo de IECA:              Ramipril:                      Enalapril:                      Otros:

ARAII                      No                      Sí

Tipo de ARAII:              Losartan:                      Cande:                      Val:                      Telmi:                      Otros:

IECA o ARAII              No                      Sí

Betabloqueante              No                      Sí

Tipo de betabloq              Carvedilol:                      Bisoprolol:                      Metoprolol:                      Otros:

Antialdosterónicos:              No                      Sí

Tipo de antialdost                      Espironolactona:                      Eplerenona:

Digoxina:                      No                      Sí                      En caso afirmativo indicar dosis:

Tratamiento inotropo: No                      Si                      Tipo:

Antiagregantes:              No                      Sí

Anticoagulantes:              No                      Sí

Tipo de anticoag              Sintrom                      Dabigatrán                      Rivaroxabán                      Apixaban

Estatinas:                      No                      Sí

Nitratos:                      No                      Sí

Amiodarona:              No                      Sí

Dronedarona:              No                      Sí

Ivabradina:              No                      Sí                      Indicar dosis:

## Tratamiento ambulatorio frente a tratamiento hospitalario en el paciente con insuficiencia cardiaca aguda

### COMORBILIDAD (CHARLSON)

|                                  |        |        |
|----------------------------------|--------|--------|
| Anemia (Hb<12g/dl)               | No (0) | Sí (1) |
| IAM                              | No (0) | Sí (1) |
| EPOC                             | No (0) | Sí (1) |
| ICC                              | No (0) | Sí (1) |
| Enfermedad vascular periférica   | No (0) | Sí (1) |
| Enfermedad cerebrovascular       | No (0) | Sí (1) |
| Demencia                         | No (0) | Sí (1) |
| Enfermedad reumática             | No (0) | Sí (1) |
| Úlcera péptica                   | No (0) | Sí (1) |
| Enfermedad hepática leve         | No (0) | Sí (1) |
| Diabetes leve-moderada           | No (0) | Sí (1) |
| Diabetes complicaciones crónicas | No (0) | Sí (2) |
| Hemiplejia o paraplejia          | No (0) | Sí (2) |
| Enferm renal (ClCr<30 ml/min)    | No (0) | Sí (2) |
| Tumores malignos                 | No (0) | Sí (2) |
| Enfermedad hepática mod-grave    | No (0) | Sí (3) |
| Tumor sólido metastático         | No (0) | Sí (6) |
| SIDA                             | No (0) | Sí (6) |

Puntuación Charlson:

### DATOS ANALÍTICOS

Hb:

HbA1c:

Creatinina:

Na:

PCR:

Colesterol total:

HDL:

LDL:

TG:

Ferritina:

FG Crockcroft:

FG MDRD7:

Proteínas totales:

Tratamiento ambulatorio frente a tratamiento hospitalario en el paciente con insuficiencia cardiaca aguda

Albúmina:

Prealbúmina:

Transferrina:

Hierro:

Linfocitos:

NTproBNP:

## NIVEL DE DISNEA

Valor de escala visual analógica (0-100 mm) a las 24h: 48h: 5 días:

## ANÁLISIS DE COSTES

- Número de días de ingreso (relacionados con el episodio índice):
- Número de estancias en hospital de día (relacionadas con el episodio índice):
- Número de consultas a UIC (relacionadas con el episodio índice):
- Número de visitas a domicilio (relacionadas con el episodio índice):

## COMENTARIOS

### PRIMER SEGUIMIENTO (1 meses)

Fecha:

|                 |   |    |     |    |
|-----------------|---|----|-----|----|
| Grado funcional | I | II | III | IV |
|-----------------|---|----|-----|----|

## EVENTOS

|                               |     |                                     |
|-------------------------------|-----|-------------------------------------|
| Muerte                        | No  | Sí                                  |
| Tipo de muerte:               | ICC | Súbita      Otra CV      Otra no CV |
| Tiempo desde el alta (meses): |     |                                     |
| Ingreso por IC                | No  | Sí                                  |
| Tiempo desde el alta (meses): |     |                                     |
| Muerte o ingreso por IC:      | No  | Sí                                  |
| Tiempo desde el alta (meses): |     |                                     |
| Ingreso de otra causa CV:     | No  | Sí                                  |
| Tiempo desde el alta (meses): |     |                                     |
| Ingreso CV total              | No  | Sí                                  |
| Tiempo desde el alta (meses): |     |                                     |
| Ingreso de causa no CV        | No  | Sí                                  |

## Tratamiento ambulatorio frente a tratamiento hospitalario en el paciente con insuficiencia cardíaca aguda

Tiempo desde el alta (meses):

Ingreso por cualquier causa: No                      Sí

Tiempo desde el alta (meses):

Número de ingresos IC:

Número de ingresos CV:

Número de ingresos totales:

Trasplante                      No                      Sí

Revasc coronaria                      No                      Percutánea                      Quirúrgica

DAI                      No                      Sí

TRC                      No                      Sí

Nº días de ingreso IC:

Nº días de ingreso CV:

Nº días de ingreso total:

**TRATAMIENTO**

Diurético                      No                      Sí

Tipo diurético                      Furosemida:                      Torasemida:                      HCT:                      Otros:

IECA                      No                      Sí

Tipo de IECA:                      Ramipril:                      Enalapril:                      Otros:

ARAII                      No                      Sí

Tipo de ARAII:                      Losartan:                      Cande:                      Val:                      Telmi:                      Otros:

IECA o ARAII                      No                      Sí

Betabloqueante                      No                      Sí

Tipo de betabloq                      Carvedilol:                      Bisoprolol:                      Metoprolol:                      Otros:

Antialdosterónicos:                      No                      Sí

Tipo de antialdost                      Espironolactona:                      Eplerenona:

Digoxina:                      No                      Sí                      En caso afirmativo indicar dosis:

Antiagregantes:                      No                      Sí

Tipo de antiagr                      AAS                      Clopidogrel                      AAS+clopidogrel                      AAS+ticagrelor  
AAS+prasugrel

Anticoagulantes:                      No                      Sí

Tipo de anticoag                      Sintrom                      Dabigatrán                      Rivaroxabán                      Apixaban

Estatinas:                      No                      Sí

Nitratos:                      No                      Sí

Amiodarona:                      No                      Sí

Tratamiento ambulatorio frente a tratamiento hospitalario en el paciente con insuficiencia cardíaca aguda

|              |    |    |                |
|--------------|----|----|----------------|
| Dronedarona: | No | Sí |                |
| Ivabradina:  | No | Sí | Indicar dosis: |

## DATOS ANALÍTICOS

Hb:

HbA1c:

Creatinina:

Na:

PCR:

Colesterol total:

HDL:

LDL:

TG:

Ferritina:

FG Crockcroft:

FG MDRD7:

Proteínas totales:

Albúmina:

Prealbúmina:

Transferrina:

Hierro:

Linfocitos:

NTproBNP:

## SEGUNDO SEGUIMIENTO (6 meses)

Fecha:

|                 |   |    |     |    |
|-----------------|---|----|-----|----|
| Grado funcional | I | II | III | IV |
|-----------------|---|----|-----|----|

## EVENTOS

|        |    |    |
|--------|----|----|
| Muerte | No | Sí |
|--------|----|----|

|                 |     |        |         |            |
|-----------------|-----|--------|---------|------------|
| Tipo de muerte: | ICC | Súbita | Otra CV | Otra no CV |
|-----------------|-----|--------|---------|------------|

Tiempo desde el alta (meses):

|                |    |    |
|----------------|----|----|
| Ingreso por IC | No | Sí |
|----------------|----|----|

Tiempo desde el alta (meses):

## Tratamiento ambulatorio frente a tratamiento hospitalario en el paciente con insuficiencia cardiaca aguda

|                               |    |            |            |  |
|-------------------------------|----|------------|------------|--|
| Muerte o ingreso por IC:      | No | Sí         |            |  |
| Tiempo desde el alta (meses): |    |            |            |  |
| Ingreso de otra causa CV:     | No | Sí         |            |  |
| Tiempo desde el alta (meses): |    |            |            |  |
| Ingreso CV total              | No | Sí         |            |  |
| Tiempo desde el alta (meses): |    |            |            |  |
| Ingreso de causa no CV        | No | Sí         |            |  |
| Tiempo desde el alta (meses): |    |            |            |  |
| Ingreso por cualquier causa:  | No | Sí         |            |  |
| Tiempo desde el alta (meses): |    |            |            |  |
| Número de ingresos IC:        |    |            |            |  |
| Número de ingresos CV:        |    |            |            |  |
| Número de ingresos totales:   |    |            |            |  |
| Trasplante                    | No | Sí         |            |  |
| Revasc coronaria              | No | Percutánea | Quirúrgica |  |
| DAI                           | No | Sí         |            |  |
| TRC                           | No | Sí         |            |  |
| Nº días de ingreso IC:        |    |            |            |  |
| Nº días de ingreso CV:        |    |            |            |  |
| Nº días de ingreso total:     |    |            |            |  |

**TRATAMIENTO**

|                     |                  |             |                                   |        |        |  |
|---------------------|------------------|-------------|-----------------------------------|--------|--------|--|
| Diurético           | No               | Sí          |                                   |        |        |  |
| Tipo diurético      | Furosemida:      | Torasemida: | HCT:                              | Otros: |        |  |
| IECA                | No               | Sí          |                                   |        |        |  |
| Tipo de IECA:       | Ramipril:        | Enalapril:  | Otros:                            |        |        |  |
| ARAI                | No               | Sí          |                                   |        |        |  |
| Tipo de ARAII:      | Losartan:        | Cande:      | Val:                              | Telmi: | Otros: |  |
| IECA o ARAII        | No               | Sí          |                                   |        |        |  |
| Betabloqueante      | No               | Sí          |                                   |        |        |  |
| Tipo de betabloq    | Carvedilol:      | Bisoprolol: | Metoprolol:                       | Otros: |        |  |
| Antialdosterónicos: | No               | Sí          |                                   |        |        |  |
| Tipo de antialdost  | Espironolactona: | Eplerenona: |                                   |        |        |  |
| Digoxina:           | No               | Sí          | En caso afirmativo indicar dosis: |        |        |  |
| Antiagregantes:     | No               | Sí          |                                   |        |        |  |

Tratamiento ambulatorio frente a tratamiento hospitalario en el paciente con insuficiencia cardiaca aguda

| Tipo de antiagr  | AAS           | Clopidogrel | AAS+clopidogrel | AAS+ticagrelor |
|------------------|---------------|-------------|-----------------|----------------|
|                  | AAS+prasugrel |             |                 |                |
| Anticoagulantes: | No            | Sí          |                 |                |
| Tipo de anticoag | Sintrom       | Dabigatrán  | Rivaroxabán     | Apixaban       |
| Estatinas:       | No            | Sí          |                 |                |
| Nitratos:        | No            | Sí          |                 |                |
| Amiodarona:      | No            | Sí          |                 |                |
| Dronedarona:     | No            | Sí          |                 |                |
| Ivabradina:      | No            | Sí          | Indicar dosis:  |                |

**DATOS ANALÍTICOS**

Hb:

HbA1c:

Creatinina:

Na:

PCR:

Colesterol total:

HDL:

LDL:

TG:

Ferritina:

Crockcroft:

MDRD7:

Proteínas totales:

Albúmina:

Prealbúmina:

Transferrina:

Hierro:

Linfocitos:

NTproBNP:
